# Supplementary material for: The WIF domain of the human and Drosophila Wif-1 secreted factors confers specificity for Wnt or Hedgehog
Source: Oxford University Press journal article supplement (doi:10.1242/dev.080028), 2012-09-06
Supplement: dev080028tables1a.pdf [file dev080028tables1a.pdf]

| <b>Table S1A.</b> Sequences of Wif-1 and Shf used in the phylogenetic analysis.   |                |                                                    |         |         |         |         |         |
|-----------------------------------------------------------------------------------|----------------|----------------------------------------------------|---------|---------|---------|---------|---------|
| WIF domain corresponds to Pfam PF02019 and EGF domains correspond to Pfam PF07974 |                |                                                    |         |         |         |         |         |
| Species                                                                           | NCBI accession | WD                                                 | EGF 1   | EGF 2   | EGF 3   | EGF 4   | EGF 5   |
| Chordates                                                                         |                | Position of each domain in the amino acid sequence |         |         |         |         |         |
| Danio rerio                                                                       | NP_571304.1    | 36-171                                             | 180-207 | 212-239 | 244-271 | 276-303 | 308-335 |
| Gallus gallus                                                                     | NP_001186536.1 | 33-172                                             | 181-208 | 213-240 | 244-272 | 277-304 | 309-336 |
| Homo sapiens                                                                      | NP_009122.2    | 38-173                                             | 182-209 | 214-241 | 246-273 | 278-305 | 310-337 |
| Mus musculus                                                                      | NP_036045.1    | 38-173                                             | 182-209 | 214-241 | 246-273 | 278-305 | 310-337 |
| Ornithorhynchus anatinus                                                          | XP_001510408.2 | 280-411                                            | 420-447 | 452-479 | 483-511 | 516-543 | 548-575 |
| Xenopus laevis                                                                    | NP_001084220.1 | 33-168                                             | 172-204 | 209-236 | 241-268 | 273-300 | 305-332 |
| Arthropods                                                                        |                | Position of each domain in the amino acid sequence |         |         |         |         |         |
| Anopheles gambiae                                                                 | XP_311028.4    | 49-186                                             | 207-236 | 241-268 | 273-300 | 304-332 | 339-368 |
| Drosophila melanogaster                                                           | NP_572349.1    | 119-261                                            | 283-310 | 315-342 | 347-374 | 378-406 | 411-440 |
| Ixodes scapularis                                                                 | XP_002401034.1 | 1-87                                               | absent  | 82-109  | 112-141 | 146-173 | 184-216 |
| Nasonia vitripennis                                                               | XP_001606619.1 | 44-181                                             | absent  | 201-233 | 237-265 | 269-297 | 304-335 |
| Tribolium castaneum                                                               | XP_967866.1    | 41-178                                             | 178-214 | 219-246 | 249-278 | 283-310 | 319-347 |
