# Supplementary material for: The WIF domain of the human and Drosophila Wif-1 secreted factors confers specificity for Wnt or Hedgehog
Source: Oxford University Press journal article supplement (doi:10.1242/dev.080028), 2012-09-06
Supplement: dev080028tables1b.pdf [file dev080028tables1b.pdf]

**Table S1B.** Sequences of receptors and putative receptors that contain WD used in the phylogenetic analysis. WIF domain corresponds to Pfam PF02019

| Species                  | NCBI accession | WD                                            |
|--------------------------|----------------|-----------------------------------------------|
| Chordates                |                | Position of domain in the amino acid sequence |
| Danio rerio              | NP_001077295.1 | 62-188                                        |
| Gallus gallus            | XP_422674.3    | 40-168                                        |
| Homo sapiens             | NP_001005861.1 | 66-194                                        |
| Mus musculus             | NP_038677.3    | 50-178                                        |
| Ornithorhynchus anatinus | XP_001506678.2 | 1-76                                          |
| Xenopus laevis           | NP_001086278.1 | 55-182                                        |
| Xenopus laevis           | NP_001089445.1 | 56-184                                        |
| Arthropods               |                | Position of domain in the amino acid sequence |
| Anopheles gambiae        | XP_316438.5    | 1-119                                         |
| Anopheles gambiae        | XP_317454.4    | 1-119                                         |
| Drosophila melanogaster  | NP_610835.2    | 29-160                                        |
| Drosophila melanogaster  | NP_477341.2    | 49-180                                        |
| Drosophila melanogaster  | NP_477139.1    | 24-155                                        |
| Nasonia vitripennis      | XP_001606015.2 | 27-155                                        |
| Nasonia vitripennis      | XP_001605949.1 | 5-144                                         |
| Tribolium castaneum      | XP_969941.1    | 24-153                                        |
