# Supplementary material for: The WIF domain of the human and Drosophila Wif-1 secreted factors confers specificity for Wnt or Hedgehog
Source: Oxford University Press journal article supplement (doi:10.1242/dev.080028), 2012-09-06
Supplement: dev080028tables2.pdf [file dev080028tables2.pdf]

Table S2. Expression domains of Hh targets after overexpression of Shf/WIF1 chimeric proteins in the posterior compartment of the wing disc

| Genotype                                                        | Ptc   | Ci    |
|-----------------------------------------------------------------|-------|-------|
| WT                                                              | 7     | 12    |
| <i>hhGal4&gt;Shf</i>                                            | 10.7* | 16.7* |
| <i>hhGal4&gt;hWIF1</i>                                          | 7.4   | 11.6  |
| <i>hhGal4&gt;NT<sup>Dm</sup>WD<sup>Hs</sup>EGF<sup>Dm</sup></i> | 6.7   | 12.2  |
| <i>hhGal4&gt;NT<sup>Dm</sup>WD<sup>Dm</sup>EGF<sup>Hs</sup></i> | 10.6* | 18.1* |

Shown is the mean number of cells expressing the Hh targets, assessed as an average of two regions and in at least ten different discs for each genotype.

\*  $P < 0.05$ , Student's *t*-test, comparison with wild-type (WT) genotype.
